# Supplementary material for: Silencing of Ago-2 Interacting Protein SERBP1 Relieves KCC2 Repression by miR-92 in Neurons
Source: MDPI journal article supplement (doi:10.3390/cells11061052), 2022-03-20
Supplement: s1 [file s1]

# SERBP1 silencing relieves KCC2 repression by miR-92 in neurons

Barbato et al.

\* Correspondence: christian.barbato@cnr.it (C.B.); carlo.cogoni@uniroma1.it (C.C.); francesca.ruberti@cnr.it (F.R.)

**Table S1.** List of proteins and corresponding peptides identified by LC-MS/MS analysis (see materials section for description).

| NCBI accession number | Identified protein                                                                          | Mascot score (for protein identification) | Identified peptides (Mascot ions score)                                                                                                                                                                                                                                                                                                                                                                                                                                     |
|-----------------------|---------------------------------------------------------------------------------------------|-------------------------------------------|-----------------------------------------------------------------------------------------------------------------------------------------------------------------------------------------------------------------------------------------------------------------------------------------------------------------------------------------------------------------------------------------------------------------------------------------------------------------------------|
| gi 29171734           | <b>Ago2</b><br>Nominal mass (M <sub>r</sub> ): 98400 Da;<br>Calculated pI value: 9.32       | 1644                                      | LQANFFEMDIPK (79)<br>IDIYHYELDIKPEK (120)<br>TQIFGDR (34)<br>KPVFDGR (44)<br>NLYTAMPLPIGR (37)<br>LPSVPFETIQALDVVMR (114)<br>SFFTASEGCSNPLGGGR (114)<br>AQPVIEFVCEVLDFK (89)<br>HTYLPLEVCNIVAGQR (72)<br>ASFNTDPYVR (50)<br>VLQPPSILYGGGR (56)<br>AIATPVQGVWDMR (78)<br>YAQGADSVPEMFR (67)<br>NTYAGLQLVVILPGK (102)<br>VGDTVLGMATQCVQMK (98)<br>TTPQTLNLCLK (64)<br>QEIIQDLAAMVR (81)<br>ELLIQFYK (41)<br>DYQPGITFIVVQK (54)<br>SGNIPAGTTVDTK (67)<br>SVSIPAPAYYAHLVAF (77) |
|                       |                                                                                             |                                           | YESLTDPSK (61)<br>IDIIPNPQER (72)<br>TLTLVDTGIGMTK (67)<br>ADLNNLGTIAK (90)<br>ADHGEPGR (40)<br>YIDQEELNK (61)<br>SLTNDWEDHLAVK (56)<br>ALLFIPR (45)<br>APFDLFENK (46)<br>LGIHEDSTNR (50)<br>FENLCK (42)                                                                                                                                                                                                                                                                    |
| gi 20149594           | <b>heat shock 90kDa</b><br>Nominal mass (M <sub>r</sub> ): 83554; Calculated pI value: 4.97 | 657                                       | DLNCVPEIADTLGAVAK (66)                                                                                                                                                                                                                                                                                                                                                                                                                                                      |
| gi 20070220           | <b>protein arginine</b>                                                                     | 602                                       |                                                                                                                                                                                                                                                                                                                                                                                                                                                                             |

|             |                                                                                                                     |      |                                                                                                               |                                                                                                                                                                                                      |
|-------------|---------------------------------------------------------------------------------------------------------------------|------|---------------------------------------------------------------------------------------------------------------|------------------------------------------------------------------------------------------------------------------------------------------------------------------------------------------------------|
|             |                                                                                                                     |      | <p><b>methyltransferase (PRMT5)</b></p> <p>Nominal mass (M<sub>r</sub>): 73322; Calculated pI value: 5.88</p> | <p>EFIQEPAK (44)</p> <p>DWNTLIVGK (46)</p> <p>VPLVAPEDLR (61)</p> <p>TLCDYSK (33)</p> <p>AAILPTSIFLTNK (95)</p> <p>KGFPVLSK (46)</p> <p>GPLVNASLR (37)</p> <p>DPMIDNNR (47)</p> <p>EGQTICVR (38)</p> |
|             |                                                                                                                     |      | NNEESPTATVAEQGEDITSKK (110)                                                                                   |                                                                                                                                                                                                      |
|             |                                                                                                                     |      | VYVHYK (27)                                                                                                   |                                                                                                                                                                                                      |
|             |                                                                                                                     |      | FDSSHDRNEPFVFSLGK (103)                                                                                       |                                                                                                                                                                                                      |
|             |                                                                                                                     |      | NEPFVFSLGK (46)                                                                                               |                                                                                                                                                                                                      |
|             |                                                                                                                     |      | AWDIGVATMK (65)                                                                                               |                                                                                                                                                                                                      |
|             |                                                                                                                     |      | IPSNATLFFEIELLDFKGEDLFEDG-GIIR (30)                                                                           |                                                                                                                                                                                                      |
|             |                                                                                                                     |      | KGEGYSNPNEGATVEIHLEGR (147)                                                                                   |                                                                                                                                                                                                      |
| gi 1145816  | <p><b>FKBP54</b></p> <p>Nominal mass (M<sub>r</sub>): 50859; Calculated pI value: 5.80</p>                          | 1360 | DVAFTVGEGEDHDIPIGIDK (100)                                                                                    |                                                                                                                                                                                                      |
|             |                                                                                                                     |      | MQREEQCILYLGP (53)                                                                                            |                                                                                                                                                                                                      |
|             |                                                                                                                     |      | MQREEQCILYLGP Oxidation (M) (49)                                                                              |                                                                                                                                                                                                      |
|             |                                                                                                                     |      | EEQCILYLGP (46)                                                                                               |                                                                                                                                                                                                      |
|             |                                                                                                                     |      | YGFGEAGKPK (62)                                                                                               |                                                                                                                                                                                                      |
|             |                                                                                                                     |      | FGIEPNAELIYEVTLK (98)                                                                                         |                                                                                                                                                                                                      |
|             |                                                                                                                     |      | YMQAVIQYGK (57)                                                                                               |                                                                                                                                                                                                      |
|             |                                                                                                                     |      | ALGLDSANEK (81)                                                                                               |                                                                                                                                                                                                      |
|             |                                                                                                                     |      | RGEAQLLMNEFESAK (108)                                                                                         |                                                                                                                                                                                                      |
|             |                                                                                                                     |      | VLEVNPQNK (61)                                                                                                |                                                                                                                                                                                                      |
|             |                                                                                                                     |      | LQISMCK (42)                                                                                                  |                                                                                                                                                                                                      |
|             |                                                                                                                     |      | FAEQDAKEEANK (50)                                                                                             |                                                                                                                                                                                                      |
| gi 12803339 | <p><b>SERPINE1 mRNA binding protein 1</b></p> <p>Nominal mass (M<sub>r</sub>): 44291; Calculated pI value: 8.31</p> | 77   | EAGGGGVGGPGAK (53)                                                                                            |                                                                                                                                                                                                      |
|             |                                                                                                                     |      | AKVEFNIR (24)                                                                                                 |                                                                                                                                                                                                      |
|             |                                                                                                                     |      | SAAQAAAQTNSNAAGK (50)                                                                                         |                                                                                                                                                                                                      |

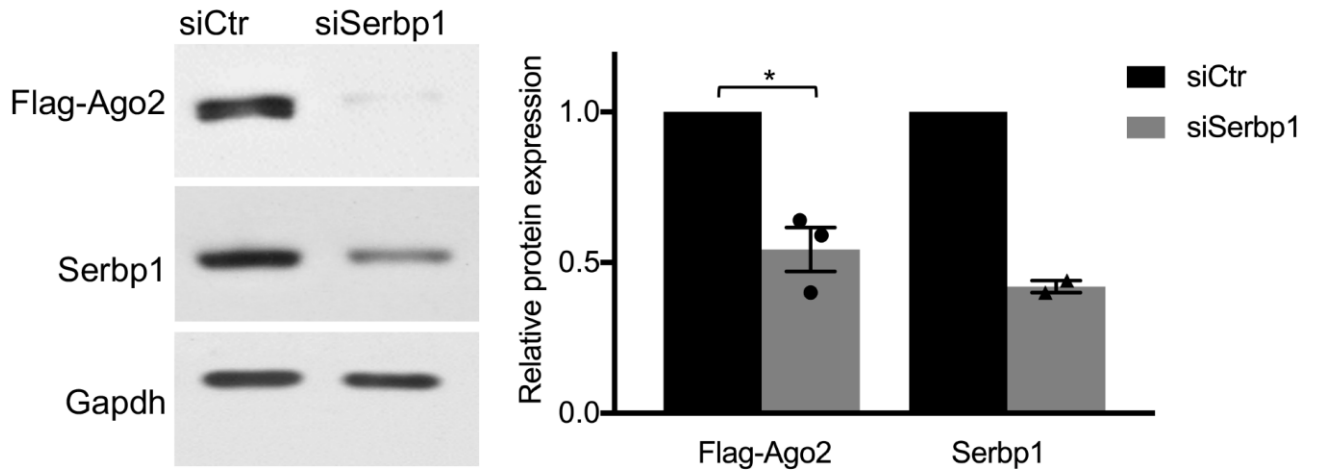

**Figure S1.** Analysis of SERBP1 silencing in Flag-Ago2-SH-SY5Y cells. Representative Western blotting showing Flag-AGO2 and SERBP1 protein levels. The GAPDH signal was used to normalize different samples. Fold change of proteins in SERBP1 silenced samples relative to control siRNA is shown. Individual data point for Flag-Ago2 (circles) and Serbp1 (triangles) proteins are indicated (Mean  $\pm$  S.E; \*— $p < 0.05$ ).
